# Supplementary material
Source: PubMed Central journal article supplement (PMC10849105)
Supplement: NIHMS1960053-supplement-Supplemental_Appendix.pdf [file NIHMS1960053-supplement-Supplemental_Appendix.pdf]

# THE LANCET Oncology

## Supplementary appendix

This appendix formed part of the original submission and has been peer reviewed.  
We post it as supplied by the authors.

Supplement to: Karschnia P, Smits M, Reifenberger G,. A framework for standardised tissue sampling and processing during resection of diffuse intracranial glioma: joint recommendations from four RANO groups. *Lancet Oncol* 2023; **24**: e438–50.

Expert Rater Panel

*Kenneth Aldape<sup>1</sup>, Joachim M. Baehring<sup>2</sup>, Lorenzo Bello<sup>3</sup>, Daniel J. Brat<sup>4</sup>, Daniel P. Cahill<sup>5</sup>, Caroline Chung<sup>6</sup>, Howard Colman<sup>7</sup>, Jorg Dietrich<sup>8</sup>, Katharine Drummond<sup>9</sup>, Yoshua Esquenazi<sup>10</sup>, Elizabeth R. Gerstner<sup>8</sup>, Julia Furtner<sup>11</sup>, Valentina Garibotto<sup>12,13,14</sup>, Timothy J. Kaufmann<sup>15</sup>, Takashi Komori<sup>16</sup>, Rupesh Kotecha<sup>17</sup>, Linda M. Liaw<sup>18</sup>, Janine M. Lupo<sup>19</sup>, Giuseppe Minniti<sup>20,21</sup>, Yoshitaka Narita<sup>22</sup>, Maximilian Niyazi<sup>23,24,25</sup>, Arie Perry<sup>26</sup>, Matthias Preusser<sup>27</sup>, Roberta Rudà<sup>28</sup>, Nader Sanai<sup>29</sup>, Nils-Ole Schmidt<sup>30</sup>, Joachim P. Steinbach<sup>31</sup>, Stefanie C. Thust<sup>32,33,34</sup>, Nelleke Tolboom<sup>35</sup>, Anouk van der Hoorn<sup>36</sup>, Thijs van der Vaart<sup>37</sup>, Antoine Verger<sup>38</sup>, Einar Osland Vik-Mo<sup>39</sup>, Colin Watts<sup>40</sup>, Manfred Westphal<sup>41</sup>, Pieter Wesseling<sup>42,43</sup>, and Jacob S. Young<sup>44</sup>*

<sup>1</sup>*Laboratory of Pathology, Center for Cancer Research, National Cancer Institute, Bethesda, Maryland, USA*

<sup>2</sup>*Departments of Neurology & Neurosurgery, Yale School of Medicine, New Haven, CT, USA*

<sup>3</sup>*Neurosurgical Oncology Unit, Department of Oncology and Hemato-Oncology, Università degli Studi di Milano, Milano, Italy*

<sup>4</sup>*Department of Pathology, Northwestern University Feinberg School of Medicine, Chicago, Illinois, USA*

<sup>5</sup>*Department of Neurosurgery, Massachusetts General Hospital, Harvard Medical School, Boston, MA, USA*

<sup>6</sup>*Departments of Radiation Oncology, The University of Texas MD Anderson Cancer Center, Houston, TX, USA*

<sup>7</sup>*Huntsman Cancer Institute and Department of Neurosurgery, University of Utah, Salt Lake City, UT, USA*

<sup>8</sup>*Department of Neurology, Division of Neuro-Oncology, Massachusetts General Hospital Cancer Center, Harvard Medical School, Boston, MA, USA*

<sup>9</sup>*Department of Neurosurgery, Royal Melbourne Hospital, Parkville, Victoria, Australia*

<sup>10</sup>*Department of Neurosurgery, McGovern Medical School at UT Health Houston, Houston, Texas, United States of America*

<sup>11</sup>*Research Center for Medical Image Analysis and Artificial Intelligence (MIAAI), Faculty of Medicine and Dentistry, Danube Private University, Krems, Austria*

<sup>12</sup>*Laboratory of Neuroimaging and Innovative Molecular Tracers (NIMTlab), Geneva University Neurocenter and Faculty of Medicine, University of Geneva, Geneva, Switzerland*

<sup>13</sup>*Division of Nuclear Medicine and Molecular Imaging, Geneva University Hospitals, Geneva, Switzerland*

<sup>14</sup>*CIBM Center for Biomedical Imaging, Geneva, Switzerland*

<sup>15</sup>*Mayo Clinic, Department of Radiology, Rochester, MN, USA*

<sup>16</sup>*Department of Laboratory Medicine and Pathology, Tokyo Metropolitan Neurological Hospital, Tokyo, Japan*

<sup>17</sup>*Department of Radiation Oncology, Miami Cancer Institute, Baptist Health South Florida, Miami, FL, USA*

<sup>18</sup>*UCLA Department of Neurosurgery, David Geffen School of Medicine at UCLA, Los Angeles, CA, USA*

<sup>19</sup>*Department of Radiology and Biomedical Imaging, University of California, San Francisco, California, USA*

<sup>20</sup>*Department of Radiological Science, Oncology and Anatomical Pathology, Umberto I Hospital, University Sapienza, Policlinico Umberto I, Rome, Italy*

<sup>21</sup>*IRCCS Istituto Neurologico Mediterraneo Neuromed, Pozzilli, Italy*

<sup>22</sup>*Department of Neurosurgery & Neuro-Oncology, National Cancer Center Hospital, Tokyo, Japan*

<sup>23</sup>*German Cancer Consortium (DKTK), Partner Site Munich, Germany*

<sup>24</sup>*Department of Radiation Oncology, University Hospital, Ludwig-Maximilians-University Munich, Munich, Germany*

<sup>25</sup>*Department of Radiation Oncology, University Hospital Tübingen, Tübingen, Germany*

<sup>26</sup>*Division of Neuropathology, Department of Pathology, University of San Francisco, San Francisco, CA, USA*

<sup>27</sup>*Division of Oncology, Department of Medicine I, Medical University of Vienna, Vienna, Austria*

<sup>28</sup>*Division of Neuro-Oncology, Department of Neuroscience, University of Turin, Italy*

<sup>29</sup>*Department of Neurosurgery, Ivy Brain Tumor Center, Barrow Neurological Institute, Phoenix, AZ, USA*

<sup>30</sup>*Department of Neurosurgery, University Medical Center Regensburg, Regensburg, Germany*

<sup>31</sup>*Dr. Senckenberg Institute of Neurooncology, Goethe University, Frankfurt am Main, Germany*

<sup>32</sup>*Precision Imaging Beacon, School of Medicine, University of Nottingham, United Kingdom*

<sup>33</sup>*Sir Peter Mansfield Imaging Centre, School of Physics and Astronomy, University of Nottingham, United Kingdom*

<sup>34</sup>*Department of Brain Rehabilitation and Repair, UCL Institute of Neurology, University College London, United Kingdom*

<sup>35</sup>*Department of Radiology and Nuclear Medicine, University Medical Center Utrecht, Utrecht University, Utrecht, The Netherlands*

<sup>36</sup>*Department of Radiology, Medical Imaging Center, University Medical Center Groningen, University of Groningen, Groningen, The Netherlands*

<sup>37</sup>*Department of Neurology, Erasmus MC Cancer Institute, Rotterdam, The Netherlands*

<sup>38</sup>*Department of Nuclear Medicine & Nancyclotep Imaging Platform, CHRU Nancy and IADI INSERM UMR 1254, Université de Lorraine, Nancy, France*

<sup>39</sup>*Department of Neurosurgery, Oslo University Hospital and Institute for Clinical Medicine, Faculty of Medicine, University of Oslo, Oslo, Norway*

<sup>40</sup>*Institute of Cancer and Genomic Sciences, College of Medical and Dental Sciences, University of Birmingham, Birmingham, United Kingdom*

<sup>41</sup>*Department of Neurosurgery, University Medical Center Hamburg-Eppendorf, Hamburg, Germany*

<sup>42</sup>*Department of Pathology, Amsterdam University Medical Centers, Amsterdam, The Netherlands*

<sup>43</sup>*Princess Máxima Center for Pediatric Oncology, Utrecht, The Netherlands*

<sup>44</sup>*Department of Neurosurgery & Division of Neuro-Oncology, University of California, San Francisco, CA, USA*
